# Supplementary material for: Boosting water oxidation activity by tuning the proton transfer process of cobalt phosphonates in neutral solution
Source: Royal Society of Chemistry journal article supplement (doi:10.1039/d0cp02194f), 2020-01-01
Supplement: d0cp02194f1.pdf [file d0cp02194f1.pdf]

# **Boosting water oxidation activity by tuning the proton transfer process of cobalt phosphonates in neutral solution**

Jiangquan Lv,\* Xiangfeng Guan, Muxin Yu, Xiaoyan Li, Yunlong Yu, and Dagui Chen

*Corresponding E-mail:* [jqlv@fjxxu.edu.cn](mailto:jqlv@fjxxu.edu.cn)

## Supplementary Figures.

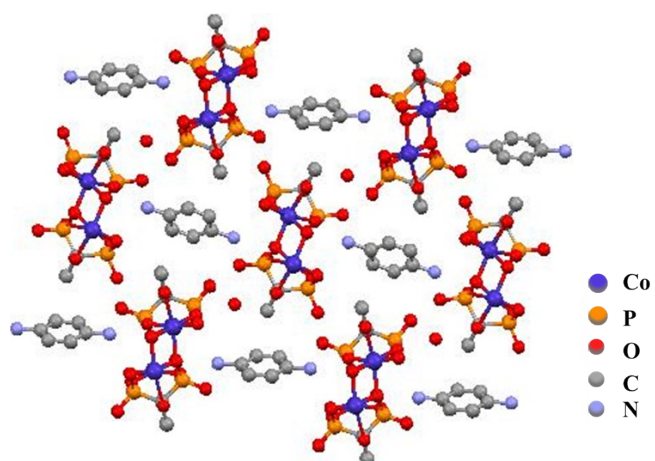

**Figure S1.** The three-dimensional supramolecular network structure of Co-PDA.

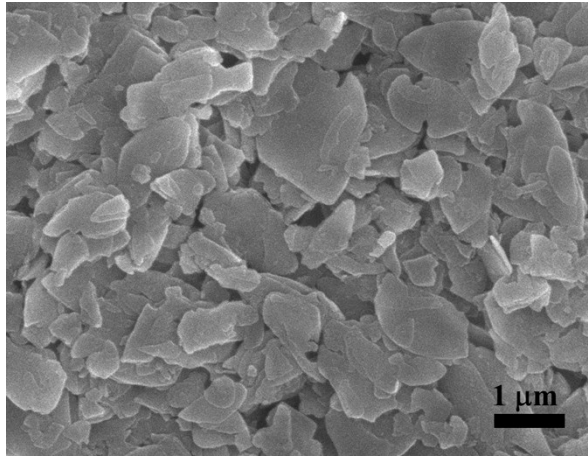

**Figure S2.** The SEM image of the Co-NH<sub>4</sub><sup>+</sup>.

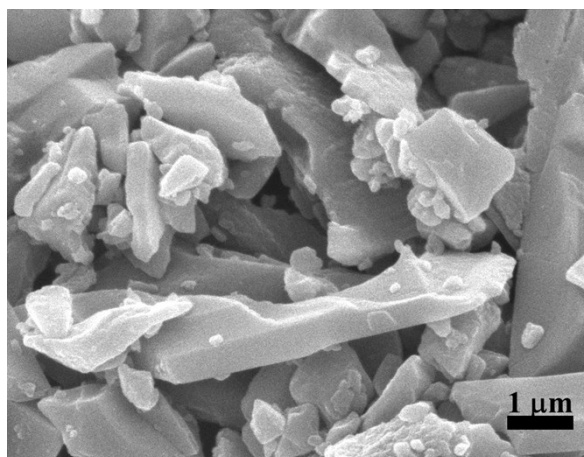

**Figure S3.** The SEM image of the Co-PDA.

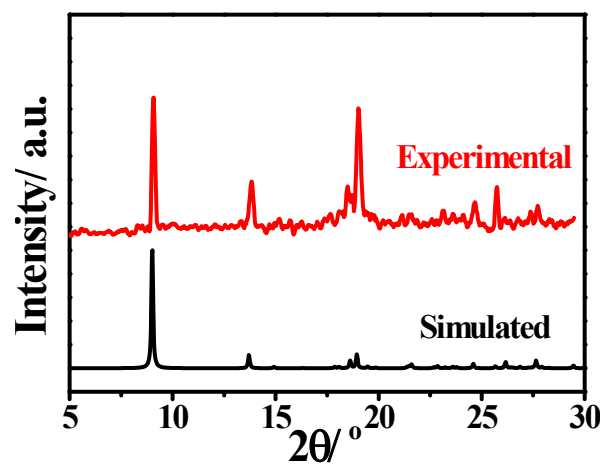

**Figure S4.** The XRD pattern and the simulated result of Co-NH<sub>4</sub><sup>+</sup>.

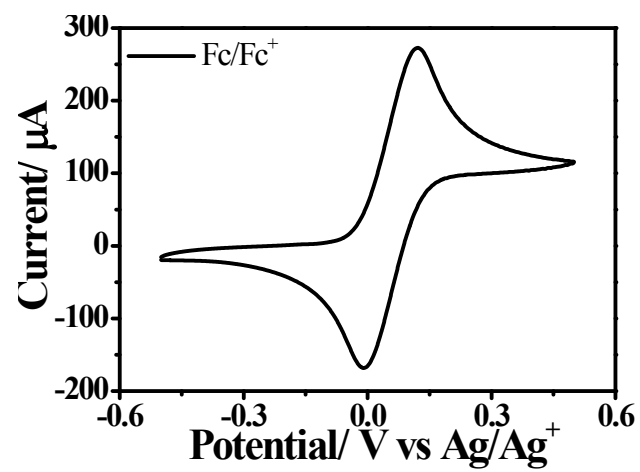

**Figure S5.** CV of ferrocene/ferrocenium (Fc/Fc<sup>+</sup>) using Ag/Ag<sup>+</sup> (1M) reference electrode.

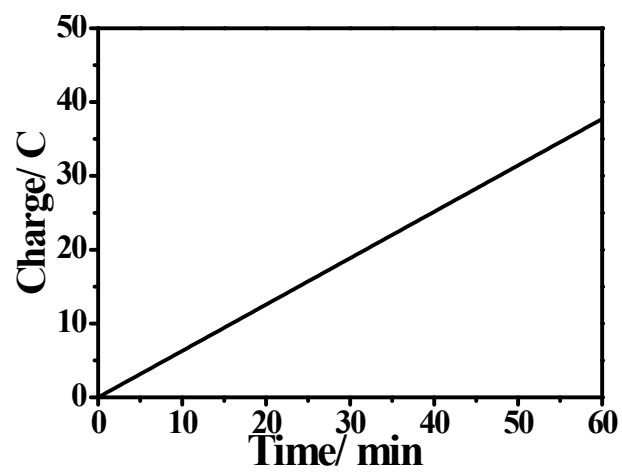

**Figure S6.** Controlled potential electrolysis of Co-PDA at 1.4 V vs Fc/Fc<sup>+</sup> resulting 94% Faradaic efficiency for O<sub>2</sub> evolution.

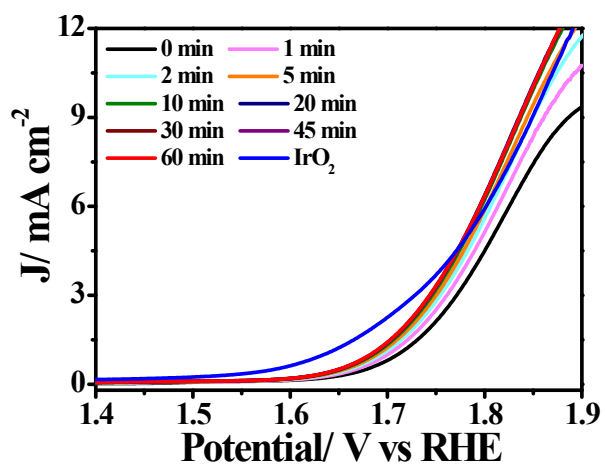

**Figure S7.** LSV curves of Co-PDA which was immersed in 50 mM PBS solution for periods of time before tests.



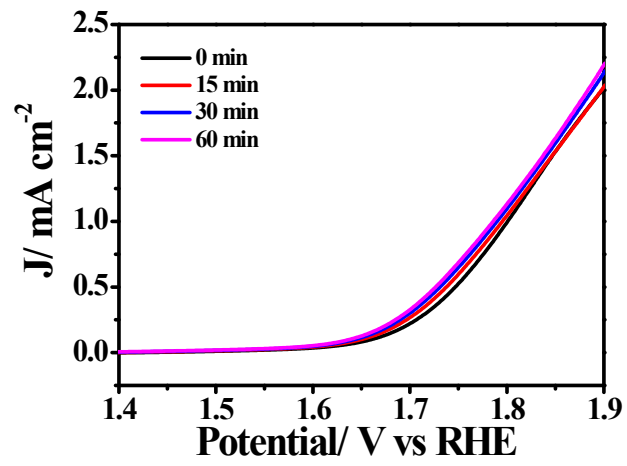

**Figure S8.** LSV curves of Co-NH<sub>4</sub><sup>+</sup> which was immersed in 50 mM PBS solution for periods of time before tests.

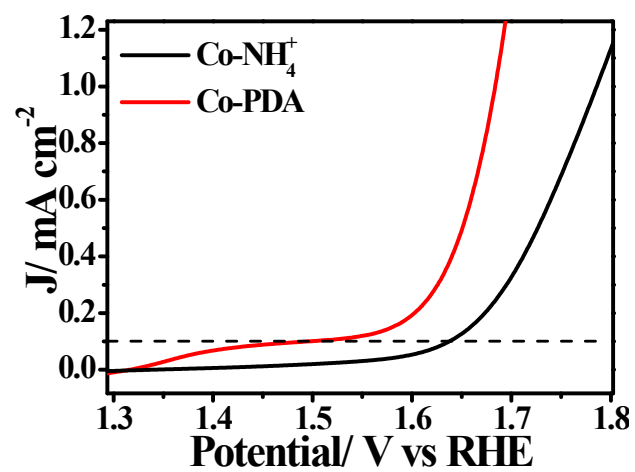

**Figure S9.** The enlarged part of LSV of Co-PDA and Co-NH<sub>4</sub><sup>+</sup> to better show the onset potential.

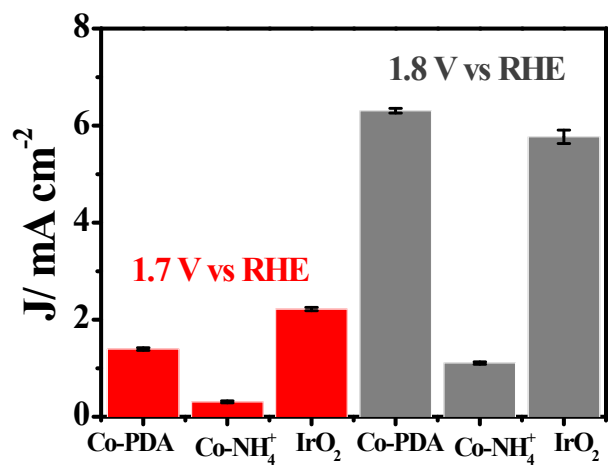

**Figure S10.** The OER performance of Co-PDA, Co-NH<sub>4</sub><sup>+</sup> and IrO<sub>2</sub> at different potential with errors bars to better show the reproducibility.

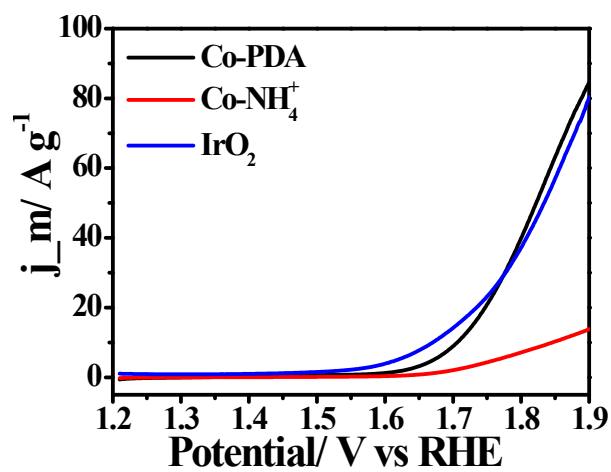

**Figure S11.** The mass current density  $j_m$  vs potential curves of Co-PDA, Co-NH<sub>4</sub><sup>+</sup> and IrO<sub>2</sub>.

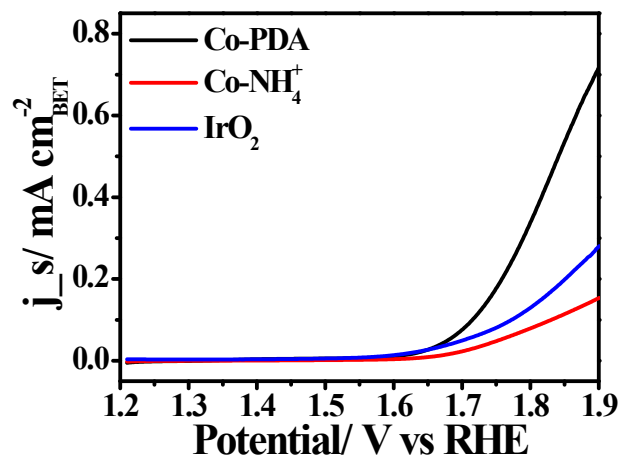

**Figure S12.** The specific current density  $j_s$  vs potential curves of Co-PDA, Co-NH<sub>4</sub><sup>+</sup> and IrO<sub>2</sub>.

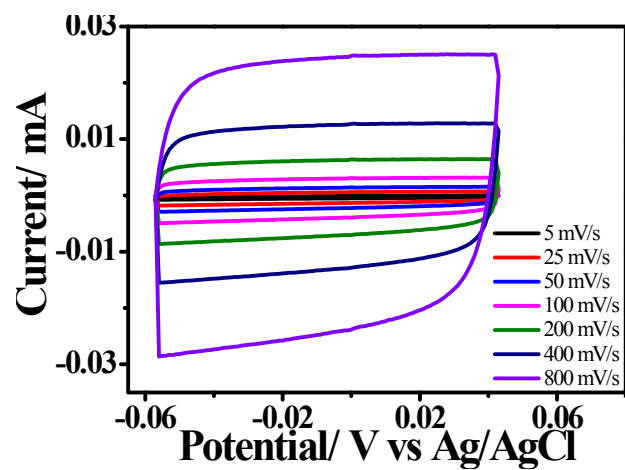

**Figure S13.** CV curves of Co-PDA were measured in a non-Faradaic region at the following scan rate: 5, 10, 25, 50, 100, 200, 400, and 800  $\text{mV s}^{-1}$ .

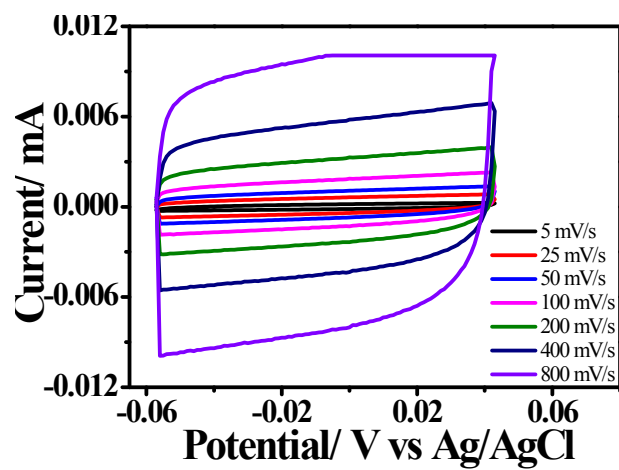

**Figure S14.** CV curves of  $\text{Co-NH}_4^+$  were measured in a non-Faradaic region at the following scan rate: 5, 10, 25, 50, 100, 200, 400, and  $800 \text{ mV s}^{-1}$ .

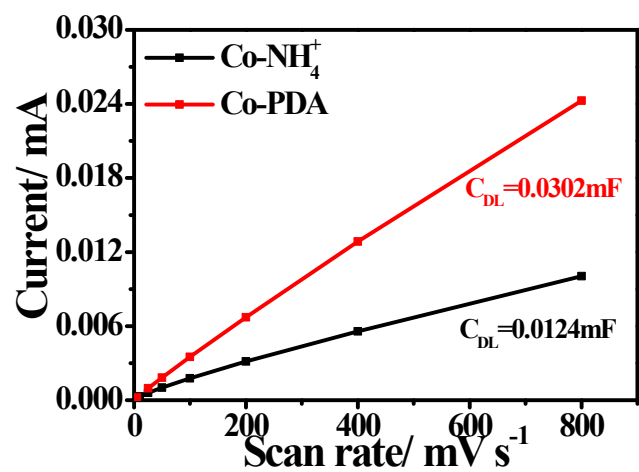

**Figure S15.** Double-layer capacitance ( $C_d$ ) data derived from CV measurements at different scan rate for Co-PDA and Co-NH<sub>4</sub><sup>+</sup>.



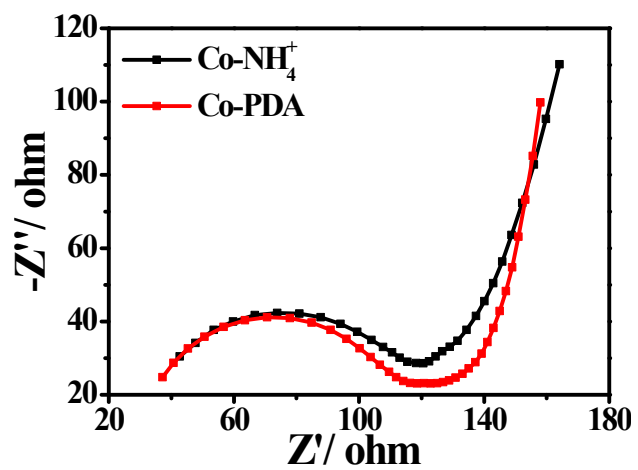

**Figure S16.** The electrochemical impedance spectra (EIS) of Co-PDA and Co-NH<sub>4</sub><sup>+</sup>.

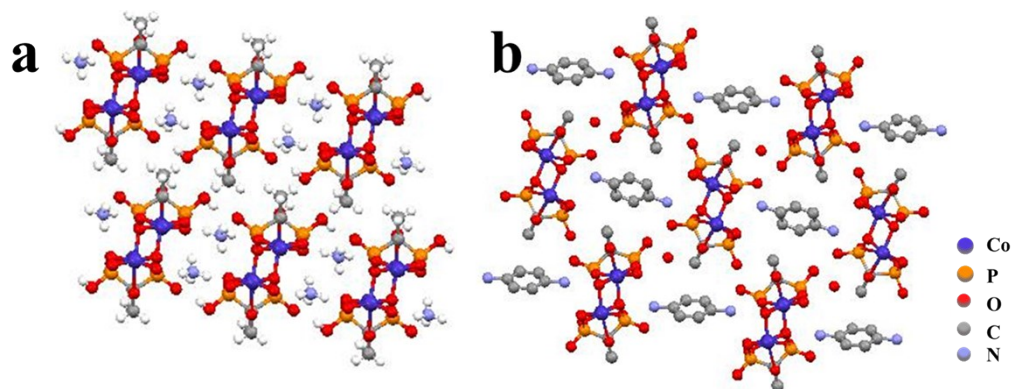

**Figure S17.** The three-dimensional supramolecular network structure of Co-PDA and Co-NH<sub>4</sub><sup>+</sup> showed the same Co<sub>2</sub>(hedpH)<sub>2</sub><sup>2-</sup> core structure.

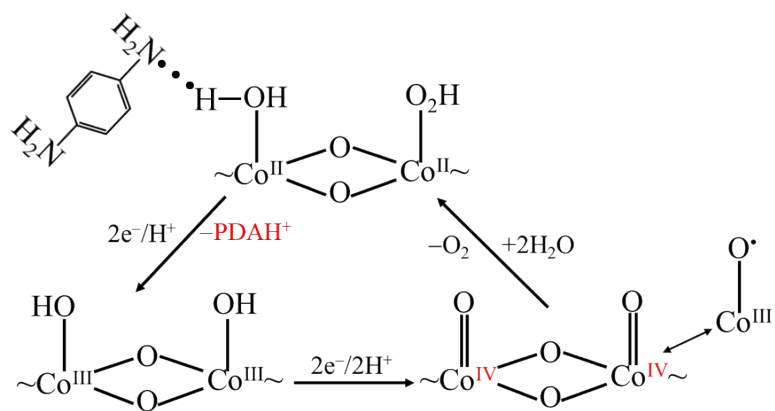

**Figure S18.** Possible water oxidation pathway for Co-PDA.

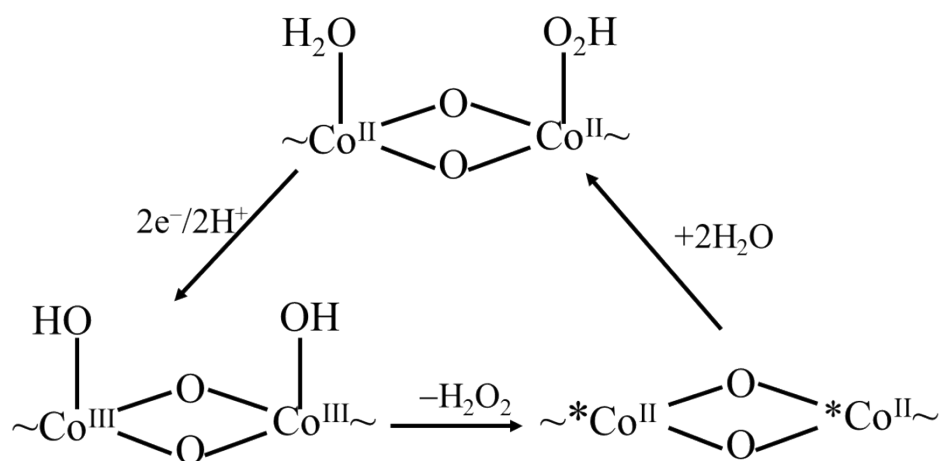

**Figure S19.** Possible water oxidation pathway for Co-NH<sub>4</sub><sup>+</sup>.

## Supplementary Table.

Table S1. Comparison of the OER performance in neutral condition (pH=7).

| Substrate          | Catalyst                                            | $\eta_{\text{onset}}$ (mV) | Tafel slop (mV/dec) | Reference |
|--------------------|-----------------------------------------------------|----------------------------|---------------------|-----------|
| Glassy carbon      | Co-PDA                                              | 250                        | 119                 | This work |
| Glassy carbon      | Co-NH <sub>4</sub> <sup>+</sup>                     | 410                        | 303                 | This work |
| Ti mesh            | Co-Pi                                               | 180                        | 187                 | S1        |
| Glassy carbon      | Cobalt(II)<br>phosphonates                          | 484                        | 83                  | S2        |
| Carbon cloth       | Co-Pi                                               | 340                        | 60                  | S3        |
| Glassy carbon      | MAF-69-Mo                                           | 270                        | 144                 | S4        |
| Carbon fiber paper | Ni <sub>0.1</sub> Co <sub>0.9</sub> P<br>nanosheets | 250                        | 148                 | S5        |

**Table S2.** The summary of BET surface areas of Co-PDA, Co-NH<sub>4</sub><sup>+</sup> and IrO<sub>2</sub>.

| <b>Sample name</b>                   | <b>BET surface areas (m<sup>2</sup>/g)</b> |
|--------------------------------------|--------------------------------------------|
| <b>Co-PDA</b>                        | 11.8                                       |
| <b>Co-NH<sub>4</sub><sup>+</sup></b> | 8.99                                       |
| <b>IrO<sub>2</sub></b>               | 28.7                                       |

## Supplementary References

- S1. L. Xie, R. Zhang, L. Cui, D. Liu, S. Hao, Y. Ma, G. Du, A. M. Asiri and X. Sun, *Angewandte Chemie International Edition*, 2017, **56**, 1064-1068.
- S2. T. Zhou, D. Wang, S. Chun-Kiat Goh, J. Hong, J. Han, J. Mao and R. Xu, *Energy Environ. Sci.*, 2015, **8**, 526-534.
- S3. A. Irshad and N. Munichandraiah, *ACS Applied Materials & Interfaces*, 2015, **7**, 15765-15776.
- S4. Y.-T. Xu, Z.-M. Ye, J.-W. Ye, L.-M. Cao, R.-K. Huang, J.-X. Wu, D.-D. Zhou, X.-F. Zhang, C.-T. He, J.-P. Zhang and X.-M. Chen, *Angewandte Chemie International Edition*, 2019, **58**, 139-143.
- S5. R. Wu, B. Xiao, Q. Gao, Y.-R. Zheng, X.-S. Zheng, J.-F. Zhu, M.-R. Gao and S.-H. Yu, *Angewandte Chemie International Edition*, 2018, **57**, 15445-15449.
